# Supplementary material
Source: Springer Nature journal article supplement (https://www.springermedizin.de/resource/supplementary/12889_2013_6385_MOESM1_ESM.pdf/9497824)
Supplement: MOESM1 [file 9497824]

**Table 3. DHS datasets used for each city included in the study.**

| City                      | Data Set Used |           |      |          |          |          |      |          |         |          |         |         |          |          |          |
|---------------------------|---------------|-----------|------|----------|----------|----------|------|----------|---------|----------|---------|---------|----------|----------|----------|
|                           | 1998          | 1999      | 2000 | 2001     | 2002     | 2003     | 2004 | 2005     | 2006    | 2007     | 2008    | 2009    | 2010     | 2011     | 2012     |
| Lagos, Nigeria            |               |           |      |          |          | DHS - IV |      |          |         |          | DHS - V |         |          |          |          |
| Kinshasa, DRC             |               |           |      |          |          |          |      |          |         | DHS - V  |         |         |          |          |          |
| Luanda, Angola            |               |           |      |          |          |          |      |          |         | DHS - IV |         |         |          | DHS - V  |          |
| Abidjan, Cote d'Ivoire    |               | DHS - III |      |          |          |          |      | DHS - V  |         |          |         |         |          |          |          |
| Nairobi, Kenya            |               |           |      |          |          | DHS - IV |      |          |         |          |         |         | DHS - VI |          |          |
| Kano, Nigeria             |               |           |      |          |          | DHS - IV |      |          |         |          | DHS - V |         |          |          |          |
| Dares Salaam, Tanzania    |               |           |      |          |          |          |      | DHS - IV |         |          |         |         |          |          | DHS - VI |
| Addis Ababa, Ethiopia     |               | DHS - IV  |      |          |          |          |      |          |         |          |         |         |          | DHS - VI |          |
| Dakar, Senegal            |               |           |      |          |          |          |      | DHS - IV |         |          |         |         |          | DHS - VI |          |
| Ibadan, Nigeria           |               |           |      |          |          | DHS - IV |      |          |         |          | DHS - V |         |          |          |          |
| Accra, Ghana              |               |           |      |          |          | DHS - IV |      |          |         |          | DHS - V |         |          |          |          |
| Douala, Cameroon          |               |           |      |          |          |          |      | DHS - IV |         |          |         |         |          | DHS - V  |          |
| Abuja, Nigeria            |               |           |      |          |          | DHS - IV |      |          |         |          | DHS - V |         |          |          |          |
| Ouagadougou, Burkina Faso |               |           |      |          |          | DHS - IV |      |          |         |          |         |         | DHS - VI |          |          |
| Antananarivo, Madagascar  |               |           |      |          |          |          |      | DHS - IV |         |          |         | DHS - V |          |          |          |
| Kumasi, Ghana             |               |           |      |          |          | DHS - IV |      |          |         |          | DHS - V |         |          |          |          |
| Yaounde, Cameroon         |               |           |      |          |          |          |      | DHS - IV |         |          |         |         |          | DHS - V  |          |
| Bamako, Mali              |               |           |      | DHS - IV |          |          |      |          |         |          |         |         | DHS - VI |          |          |
| Maputo, Mozambique        |               |           |      |          |          | DHS - IV |      |          |         |          |         |         |          | DHS - VI |          |
| Conakry, Guinea           |               | DHS - IV  |      |          |          |          |      |          | DHS - V |          |         |         |          |          |          |
| Harare, Zimbabwe          |               |           |      |          |          |          |      |          | DHS - V |          |         |         |          | DHS - VI |          |
| Kampala, Uganda           |               |           |      | DHS - IV |          |          |      |          |         |          |         |         |          | DHS - VI |          |
| Kaduna, Nigeria           |               |           |      |          |          | DHS - IV |      |          |         |          | DHS - V |         |          |          |          |
| Lumbumbashi, DRC          |               |           |      |          |          |          |      |          |         | DHS - V  |         |         |          |          |          |
| Mbuji-Mayi, DRC           |               |           |      |          |          |          |      |          |         | DHS - V  |         |         |          |          |          |
| Lusaka, Zambia            |               |           |      |          | DHS - IV |          |      |          |         | DHS - V  |         |         |          |          |          |
| Brazzaville, Congo        |               |           |      |          |          |          |      | DHS - V  |         |          |         | DHS - V |          |          |          |
| Benin City, Nigeria       |               |           |      |          |          | DHS - IV |      |          |         |          | DHS - V |         |          |          |          |
| Niamey, Niger             | DHS - III     |           |      |          |          |          |      | DHS - V  |         |          |         |         |          |          |          |
| Ogbomosho, Nigeria        |               |           |      |          |          | DHS - IV |      |          |         |          | DHS - V |         |          |          |          |
| Mombasa, Kenya            |               |           |      |          |          | DHS - IV |      |          |         |          |         |         | DHS - VI |          |          |
